# Supplementary material
Source: PubMed Central journal article supplement (PMC10188642)
Supplement: mmc1.pdf [file mmc1.pdf]

## **Supplemental Information**

**Tissue nanotransfection causes tumor regression  
by its effect on nanovesicle cargo that alters  
microenvironmental macrophage state**

**Gayle M. Gordillo, Poornachander Reddy Guda, Kanhaiya Singh, Ayan Biswas, Ahmed S. Abouhashem, Yashika Rustagi, Abhishek Sen, Manishekhar Kumar, Amitava Das, Subhadip Ghatak, Savita Khanna, Chandan K. Sen, and Sashwati Roy**

## Supplementary Figures

**Figure S1:** **A**, EOMA cells have higher miR-126 abundance compared to MAE cells. \*,  $p < 0.05$  (n=4), Mann Whitney test. **B**, Schematic representation of  $\alpha$ -miR-126 delivery into HE tumor by tissue nanotransfection (TNT). **C**, Quantification of miR-126 in tumor after delivering  $\alpha$ -126 into HE tumor by TNT, \* $p < 0.05$ , n=7,9, Mann Whitney test. **D**, FITC labeled  $\alpha$ -126 was delivered in 129P3/J mouse to check the efficiency of TNT delivery. 24h after delivery shows mostly in epidermis region. **E**, Abundance of miR-126 in different regions of tumor (d10) isolated using LCM after scramble and  $\alpha$ -126 delivery for two doses (d3, d7) after EOMA injections, \* $p < 0.05$ , n=4, Two-way ANOVA. **F**, Laser capture Micro dissection (LCM) evidences from different regions of tumor tissue (d10) sections before and after cut. **G**, Cutaneous perfusion analysis by using Perimed Laser speckle imaging at different timepoints post- TNT<sub>sham</sub> and TNT $\alpha$ -126 and its analysis (**H**) in adult mice. n=6, Two-way ANOVA. **I**, Tumor volume of day-matched animals for the control and TNT<sub>sham</sub> groups. (n=11, 5), Mann–Whitney test. **J**, Sequential evidences of tumor regression of an animal at different days after  $\alpha$ -miR-126 delivery. **K**, H&E staining of tissue sections from animal treated with  $\alpha$ -miR-126 in both tumor region and non-tumor region.

**Figure S2:** **A**, Schematic diagram of isolating extracellular vesicles from cell culture conditioned media by differential centrifugation. **B**, Nanosight distribution and quantification (**C**) of EVs isolated from MAE and EOMA cells. \*,  $p < 0.05$  (n=5), Mann Whitney test. **D**, miR-126 is more abundant in EOMA EV compared to MAE EV. \*,  $p < 0.05$  (n=6), Mann Whitney test. **E**, Nanosight characterization of EVs isolated from control and HE patient's urine samples. **F**, Schematic diagram of experimental plan for isolation of mouse urine samples after different days (d3 and d10) after EOMA cell injection. **G**, Transmission electron microscopy (TEM) images of negatively

stained EV with 2% uracyl acetate after removing the moisture. **H**, EV size distribution pattern of mouse urine samples collected at different days.

**Figure S3:** **A**, Plasmid vector map showing CDH5 promoter driven recombinant plasmids encoding CD81 with GFP. **B**, Confocal images shows expression of GFP tagged exosomes in EOMA cells (endothelial cells) but, not in keratinocytes, shows GFP tagged plasmids are specific for endothelial cells. 63 $\times$  magnification. **C**, Optimization of puromycin concentration to generate transduced EOMA stable cell line. Representative day4 images after treating with 2.5 $\mu$ g/ml puromycin shows live transduced EOMA cells, not EOMA cells. **D**, Selection of stable transduced cells after treating with 2.5 $\mu$ g/ml puromycin.

**Figure S4:** **A**, Full image representation of F4/80 (M $\phi$  marker) and LYVE1 (endothelial marker) labelled tumor section and their colocalization (**B**) for Figure 3 H. 10 $\times$  magnification. **C**, Elaborated images for Figure 3G (63 $\times$  magnification). Immuno labelling with F4/80, LYVE1 and GFP of tumor core, TAM<sub>LYVE1</sub> and tumor perimeter. **D**, H&E image shows tumor regions 1, Tumor core, 2, TAM<sub>LYVE1</sub> region, 3, tumor perimeter region. **E**, Graphical representation of tumor regions, LCM samples have been collected.

**Figure S5:** **A**, Expression of M1 and M2 markers in TAM<sub>LYVE1</sub> region captured by LCM. M2 markers were more abundant in GW4869 treated HE tumor compared to control HE tumor. Tumors were collected on day10. \*, p<0.05 (n=6), Mann Whitney test. **B**, Tumor tissue sections from HE patient's samples were stained with anti-LYVE (EOMA cell marker) and anti-CD68 (M $\phi$  marker) shows greater than 50% of EOMA cells (LYVE1) co-expressed with CD68<sup>+</sup> (**C**). \*, p<0.05 (n=5), Mann Whitney test. **D**, Mouse tumor sections (d10) were stained with anti-LYVE1 and anti- F4/80<sup>+</sup> (M $\phi$  marker) shows about 50% of EOMA cells (LYVE<sup>+</sup>) co-expressed F4/80<sup>+</sup> (**E**). \*, p<0.05 (n=5), Mann Whitney test.

**Figure S6:** **A**, *in vitro* nanoelectroporation (NEP) delivery of nucleotides into cells based on the voltage gradient. **B**, Propidium Iodide (PI, 1 $\mu$ M/ml) immuno-staining of MAE and EOMA cells after delivering scrambled and antagomiR126 at 24, 48, 72h using NEP. \*,  $p < 0.05$  (n=5), One way ANOVA. **C**, Evidence of successful knockdown (RT-PCR) of miR-126 level after 48h of NEP with control and  $\alpha$ -126 \*,  $p < 0.05$  (n=5,6), Mann Whitney test. **D**, Matrigel angiogenesis assay was used to evaluate the functional effects of miR-126 knockdown *in vitro*. Cells were stained with calcein-AM, and the area within the formed tubes was quantitated (**E**) by analyzing three high powered fields per well using AxioVision Rel 4.8 software. \*,  $p < 0.05$  (n=5), Mann Whitney test. **F**, EV content was measured using nanosight detection and EV specific inhibition of miR-126 was established (**G**) in control and  $\alpha$ -126 delivered cells. \*,  $p < 0.05$  (n=4-6), Mann Whitney test. **H**, PI immuno-staining of control inhibitor (100nM) and  $\alpha$ -126 (100nM) transfected (72h) EOMA cells. (n=5), Mann Whitney test. **I**, Significant change in miR-126 levels in EOMA cells after transfecting with  $\alpha$ -126, \*,  $p < 0.05$  (n=6), Mann Whitney test. **J**, Matrigel assay shows decrease in tube formation after mir-126 inhibition by transfection compared to control inhibition. **K**, Quantification of tube formation by analyzing three high powered fields per well using AxioVision Rel 4.8 software. \*,  $p < 0.05$  (n=3,4), Mann Whitney test. **L**, EV isolated from these transfected cells showed less miR-126 abundance (**M**) in  $\alpha$ -126 group. \*,  $p < 0.05$  (n=6), Mann Whitney test. **N**, Transfection of  $\alpha$ -126 to MAE cells resulted in miR-126 knock down in EV (EV $_{\alpha$ -126}). EV isolated from MAE cells (EV) and MAE cells transfected with control inhibitor (EV $_{con\ inh}$ ) were used as controls. \*,  $p < 0.05$  (n=6), One way ANOVA.

**Figure S7. Quality check and identification of clusters markers.**

(A) UMAP representing all cells before excluding low quality cells. (B) UMAP representing all cells with low quality cells colored by black and cells which passed quality check colored with grey. (C) Dotplot showing relative expression level of top 3 markers for each cluster. *Aif1*, more abundant in cluster 7, was used to sort the cluster 7 specific cells from M $\phi$  treated with EV<sub>EOMA</sub> for tumorigenicity assay (Figures S10B – S10C). (D) Top transcription factors, transmembrane receptors and cytokines upregulated in cluster 7 when compared to the rest of the cells (using adjusted p value < 0.05 and logFC > 0.2). Red stars over x axes-es represents cluster 7.

**Figure S8. Differential expression analysis and gene set enrichment analysis of M $\phi$  vs M $\phi$ <sub>EOMA EV</sub>.** A, Heatmap representing relative expression level of top 10 upregulated and downregulated genes between M $\phi$  vs M $\phi$ <sub>EOMA EV</sub>. B, GSEA results with FDR q-val < 0.05 for DEG when comparing M $\phi$  vs M $\phi$ <sub>EOMA EV</sub> using adjusted p value < 0.05 and logFC cutoff +/-0.2. C, Heatmap representing relative expression level of top 10 upregulated and downregulated genes between cluster 7 and cluster 4. D, GSEA results with FDR q-val < 0.05 for DEG when comparing cluster 7 cells vs cluster 4 cells using adjusted p value < 0.05 and logFC cutoff +/-0.2.

**Figure S9. Expression level of upregulated vasculogenic genes in cluster 7 or in M $\phi$ <sub>EOMA EV</sub>.**

A, Violin plots representing expression level of genes M $\phi$ , M $\phi$ <sub>miR-126 null EV</sub> and M $\phi$ <sub>EOMA EV</sub>. Genes are found to be upregulated in M $\phi$ <sub>EOMA EV</sub> compared to M $\phi$  and also upregulated in cluster 7 compared to cluster 4. B, Violin plots representing expression level of genes found to be upregulated in M $\phi$ <sub>EOMA EV</sub> compared to M $\phi$ , but not in cluster 7 compared to 4. C, Violin plots representing expression level of genes found to be upregulated in cluster 7 compared to cluster 4, but not in M $\phi$ <sub>EOMA EV</sub> compared to M $\phi$ . \*, p<0.05 (n=6), student's t-test.

**Figure S10. A,** Time dependent increased expression of chemokines (*Ccl2*, *Ccl3*, *Ccl4*, *Ccl5*) in M $\phi$  treated with miR-126 null EV (Figure S6N) (M $\phi_{\text{miR126 null EV}}$ ) and cluster 7 specific macrophages, sorted by using *Aif1* (M $\phi_{\text{AIF1+}}$ ) (Figure S7C).  $p < 0.05$  (n=3), Two-way ANOVA. **B,** Time dependent increase in colony formation in M $\phi_{\text{AIF1+}}$  as compared to M $\phi_{\text{miR126 null EV}}$  displayed no colonies in soft gel agar plate. Representative images show colonies from each cell type. 10 $\times$  magnification. **C,** Fluorescence based quantification of cell transformation assay at 485/520 filter.  $p < 0.05$  (n=5, 10), One-way ANOVA. **D,** Representative images show colony formation of EOMA cells, but not M $\phi$ . 10 $\times$  magnification. **E,** Fluorescence based quantification of cell transformation assay of M $\phi$  and EOMA cells at 485/520 filter.  $p < 0.05$  (n=5), student's t-test.

**Figure S11. Analysis of genes involved in macrophages activation process.**

**A,** Heatmap representing relative expression of genes found in our data having role in macrophage activation based on the gene ontology term macrophage activation (GO:0042116). **B,** Pie chart representing the number of upregulated, downregulated and not altered genes identified to have a role in macrophage activation.

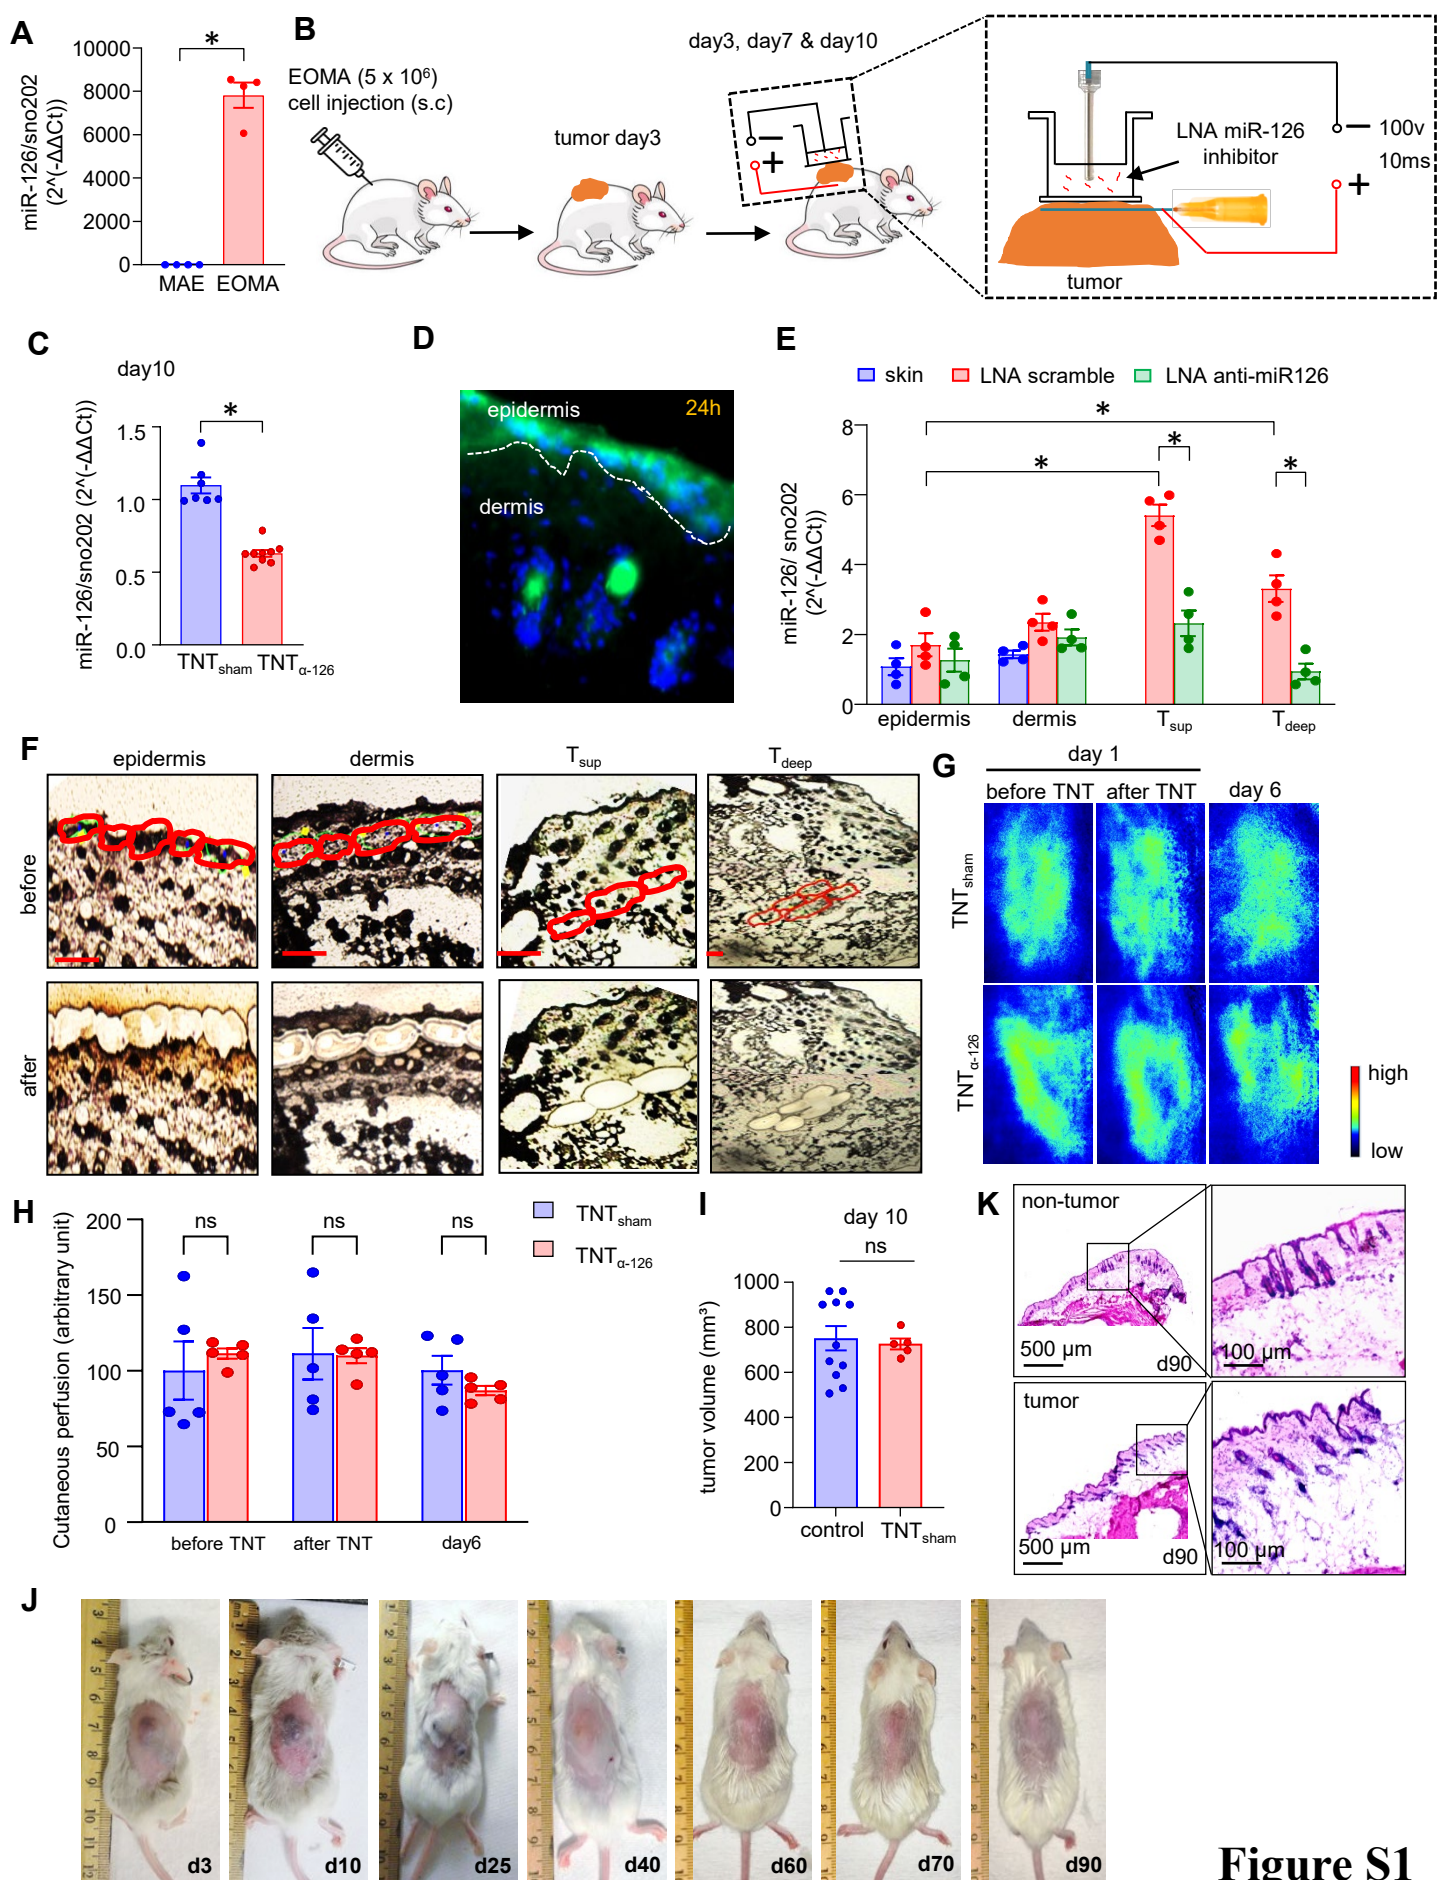

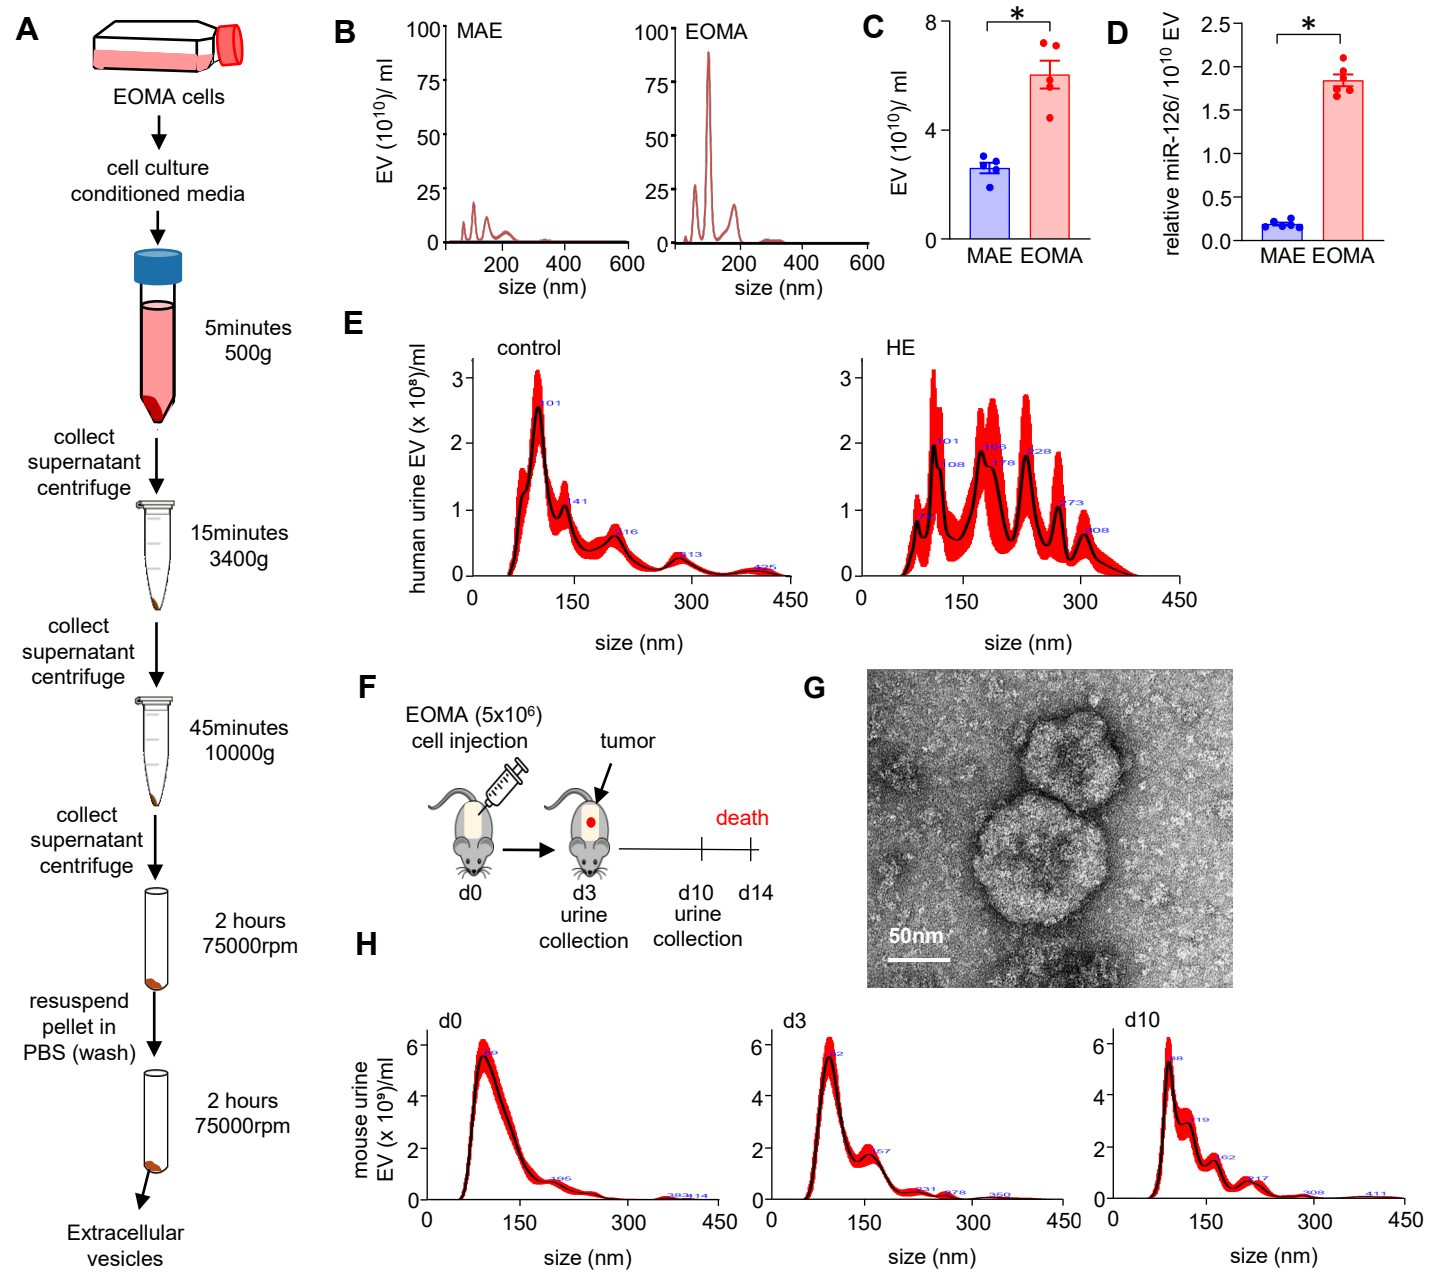

**Figure S2**



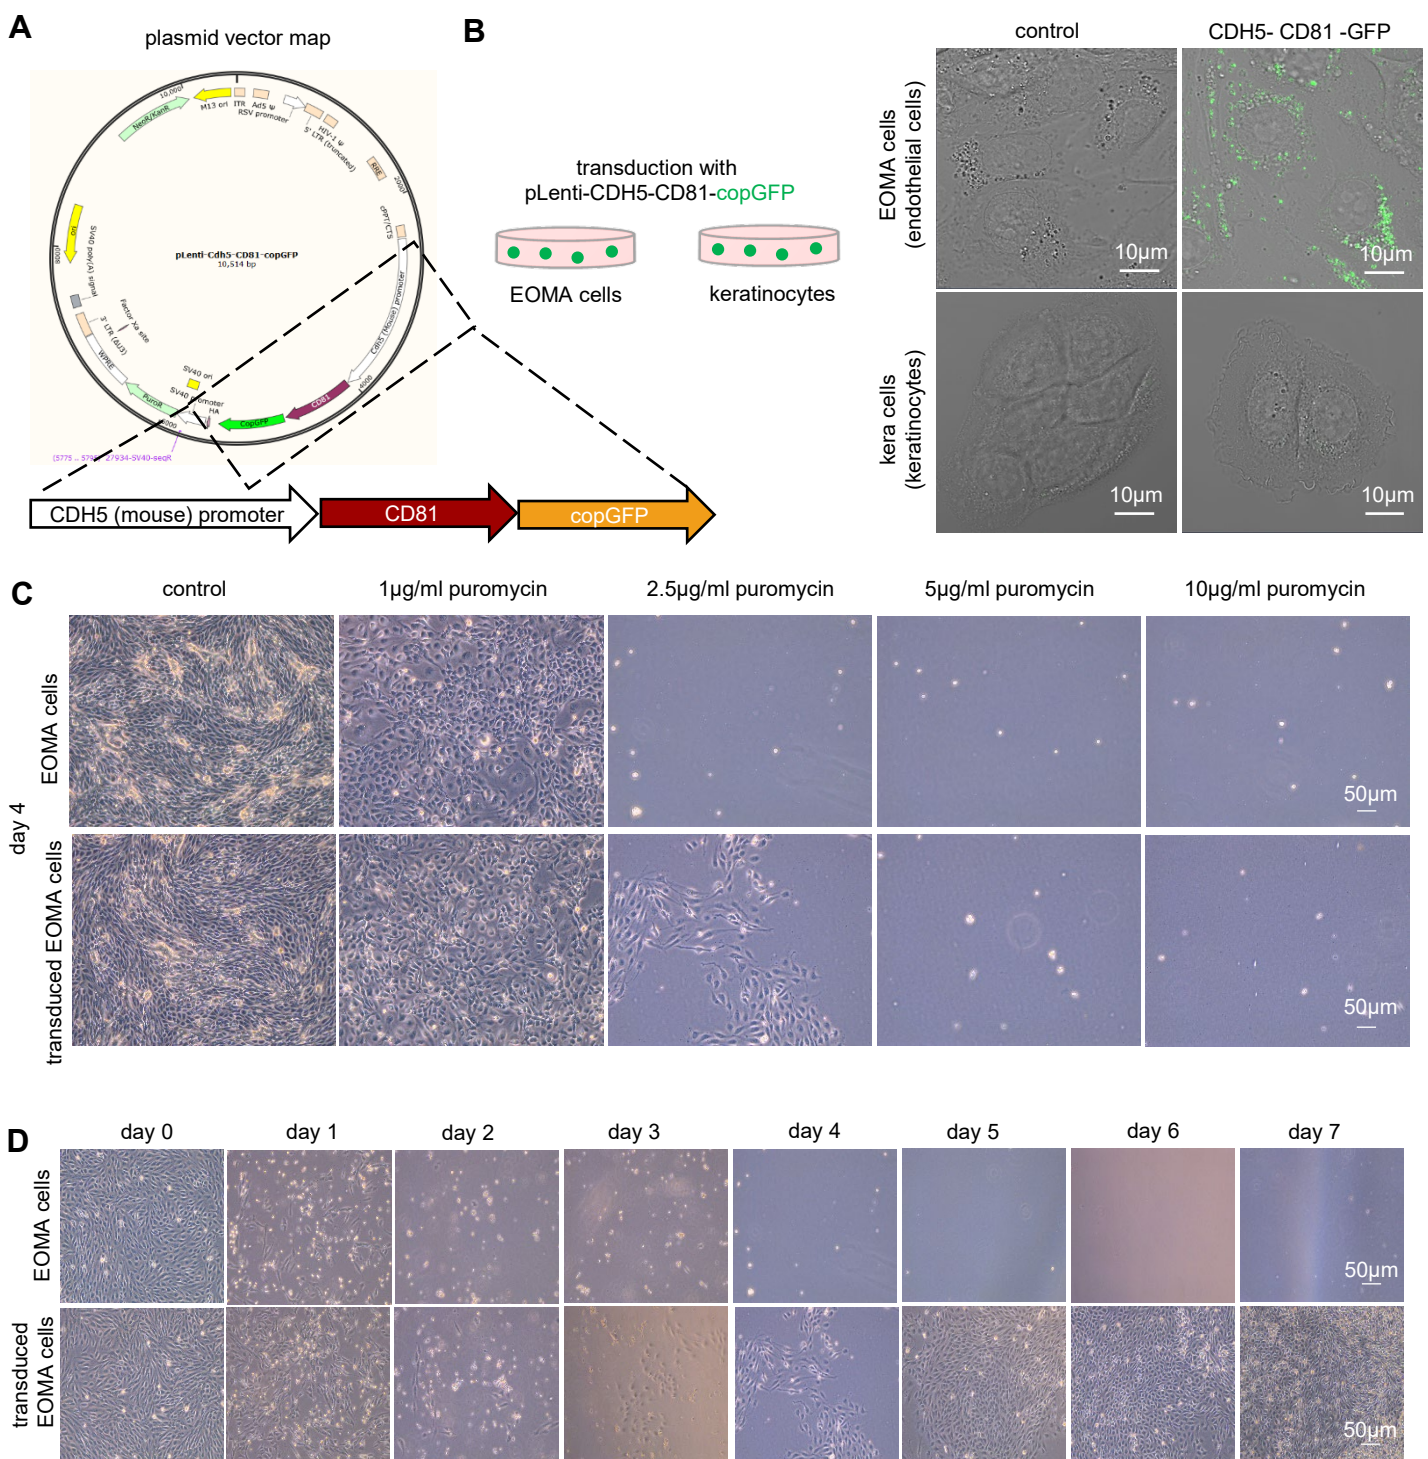

**Figure S3**

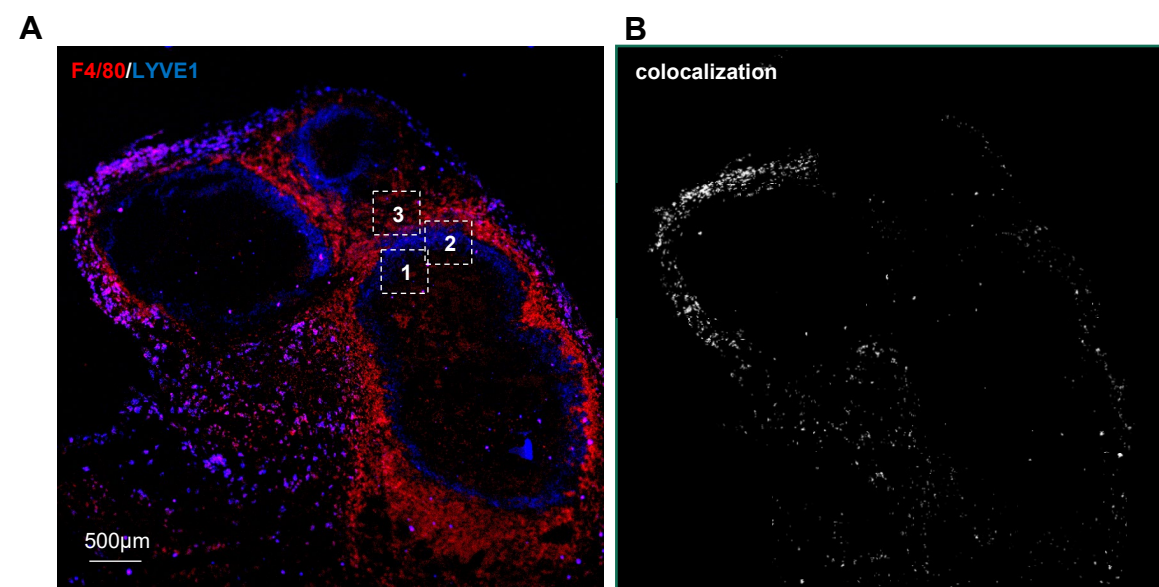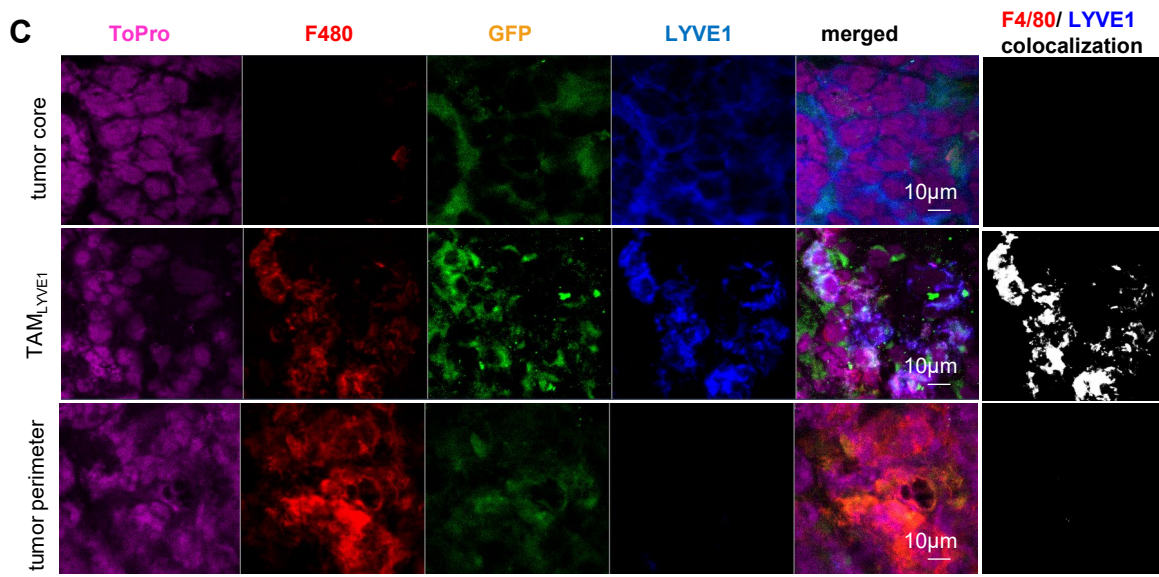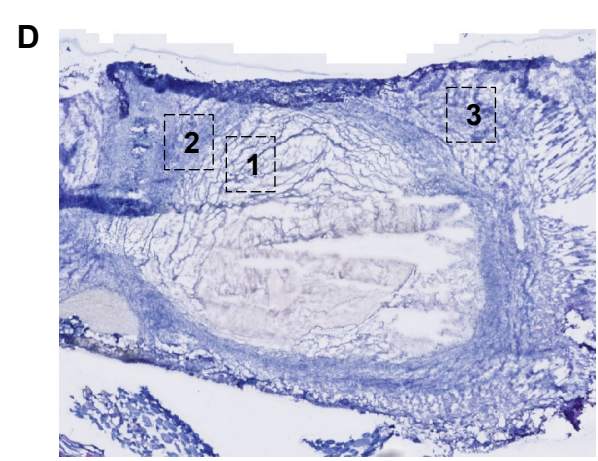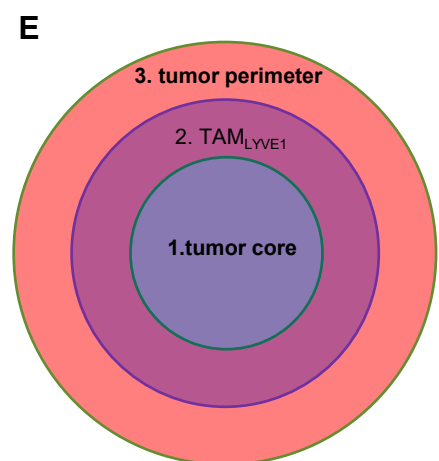

- (1)  $M\phi_{EOMA^-}$ -deficient tumor core region (tumor core),
- (2) Intermediary LYVE1<sup>+</sup> tumor associated macrophage populated region (TAM<sub>LYVE1</sub>)
- (3)  $M\phi_{EOMA^-}$ -deficient tumor perimeter region (tumor perimeter).

**Figure S4**



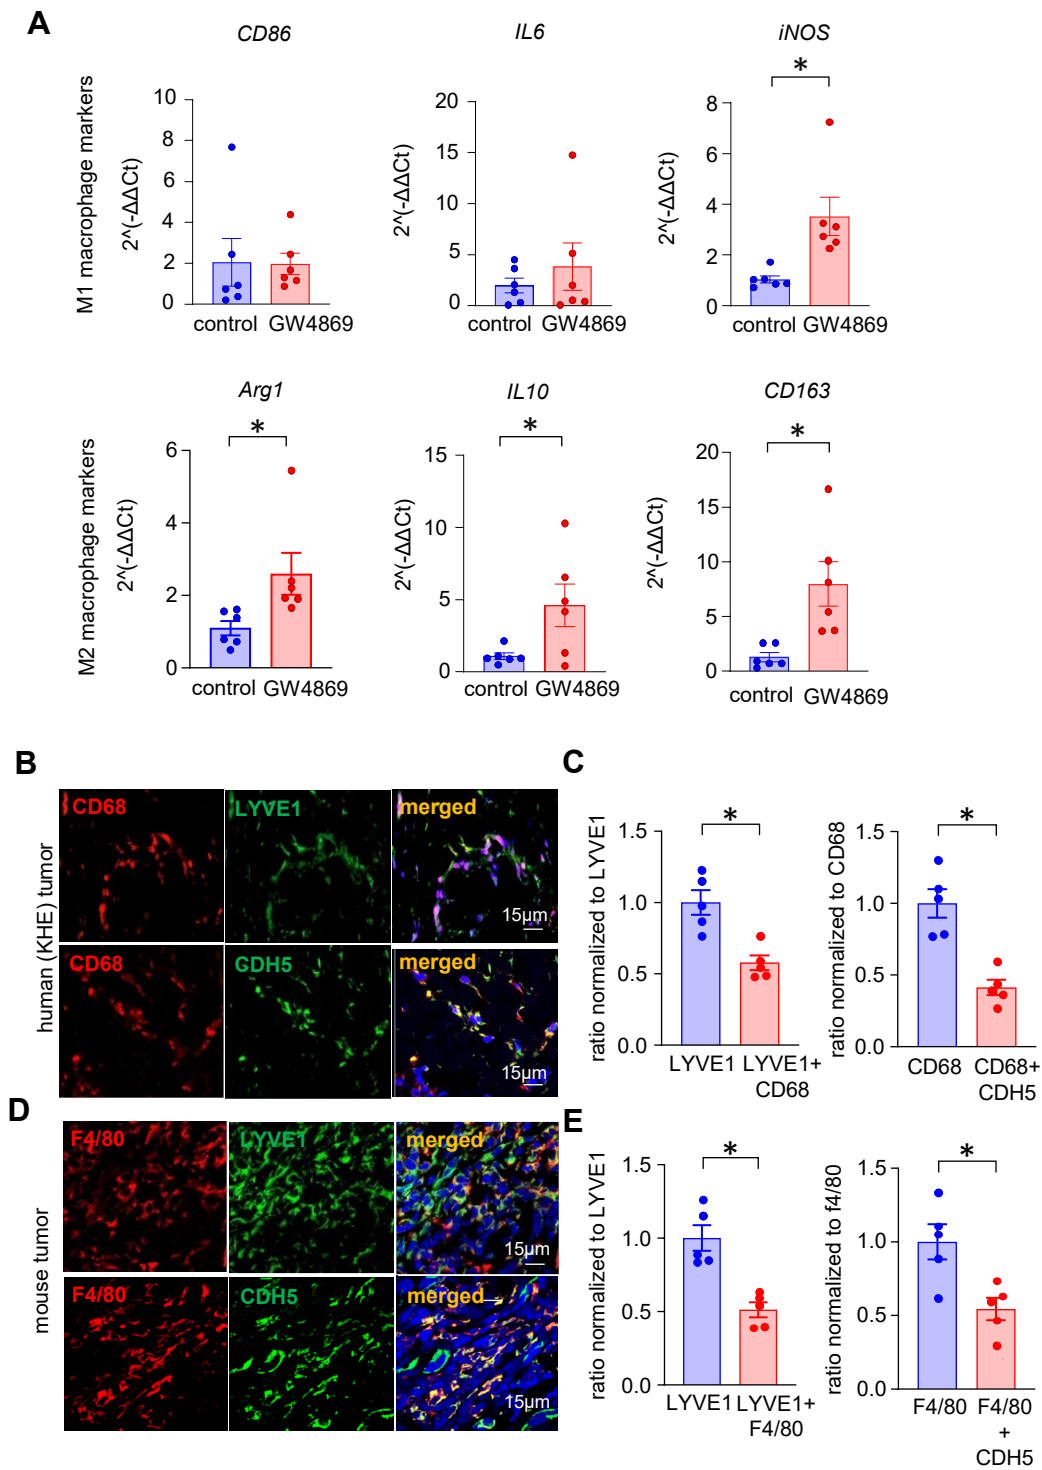

**Figure S5**

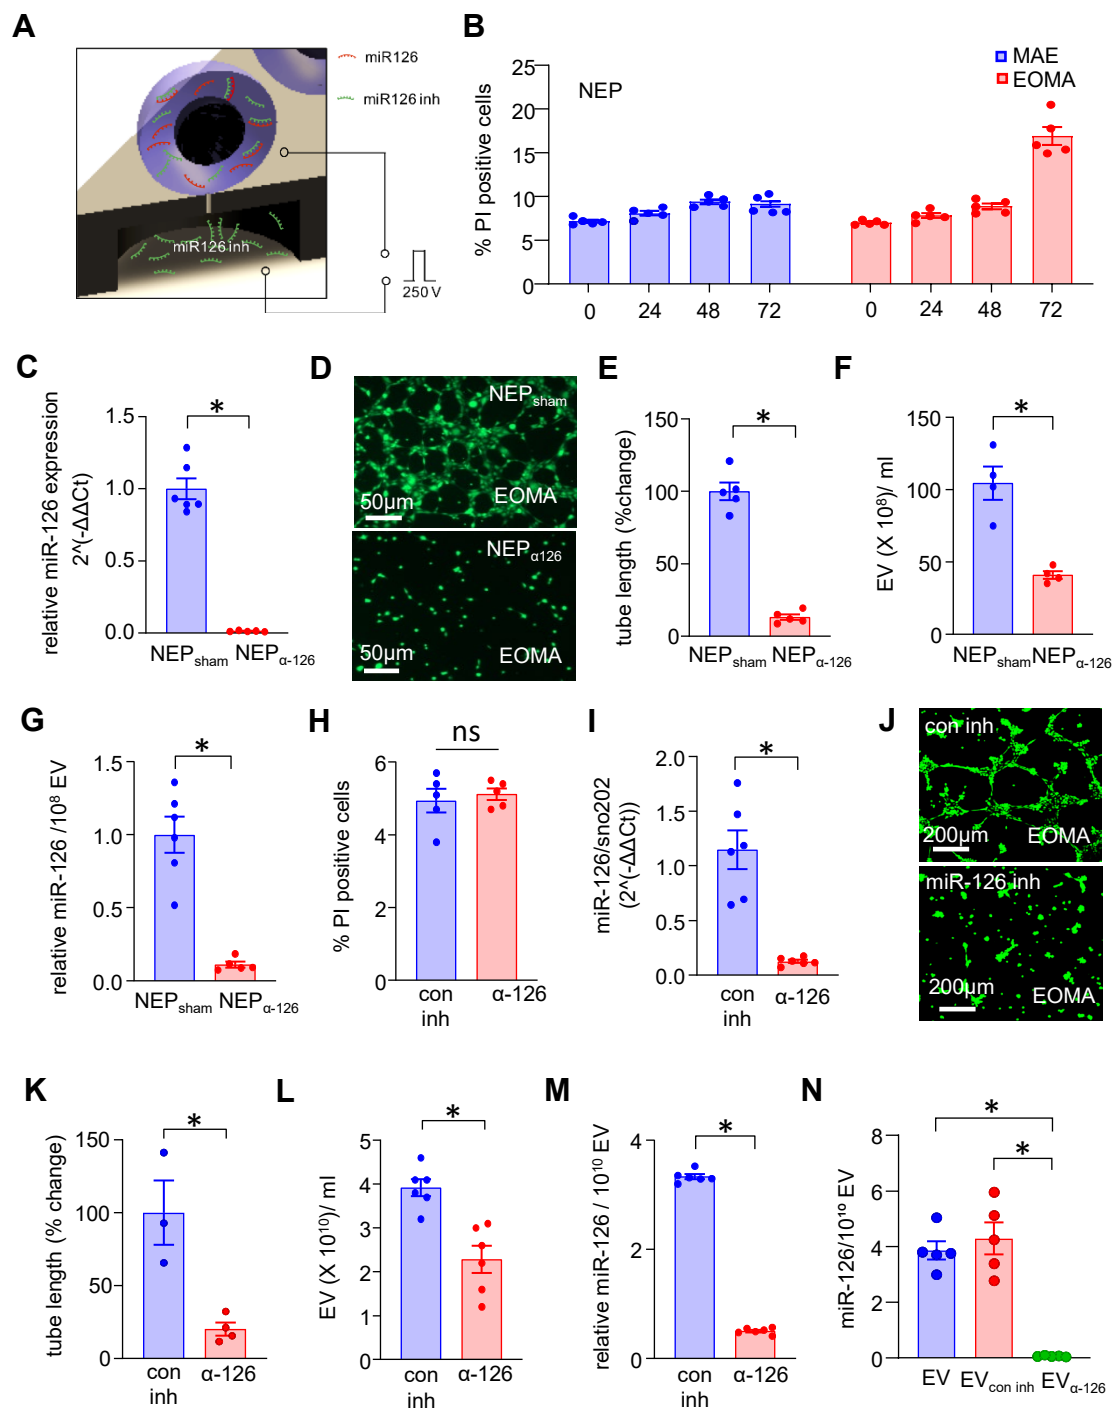

**Figure S6**

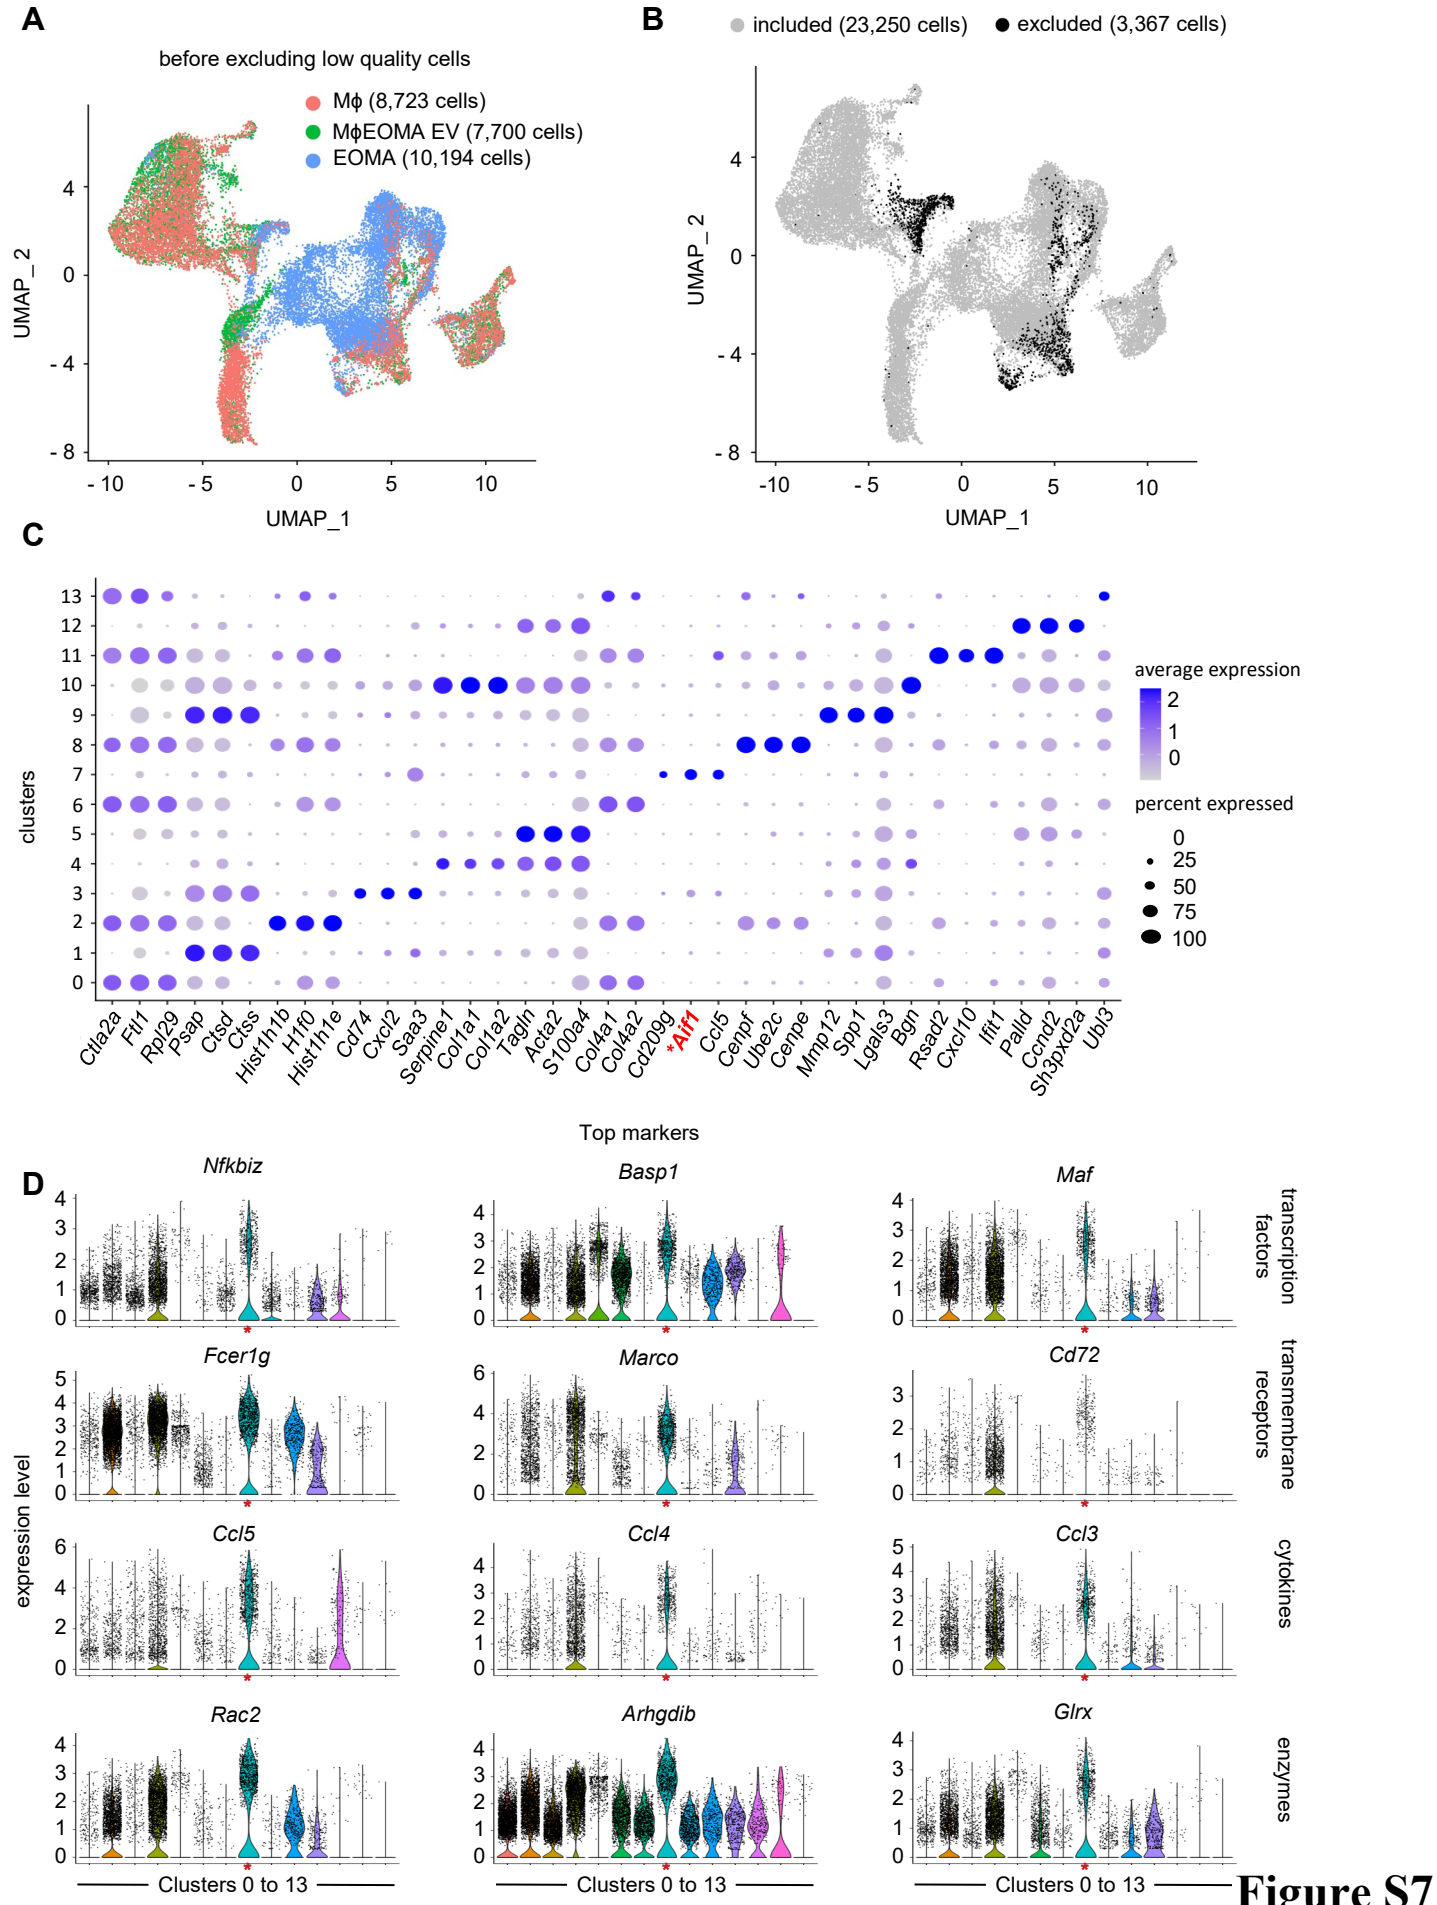

**Figure S7**

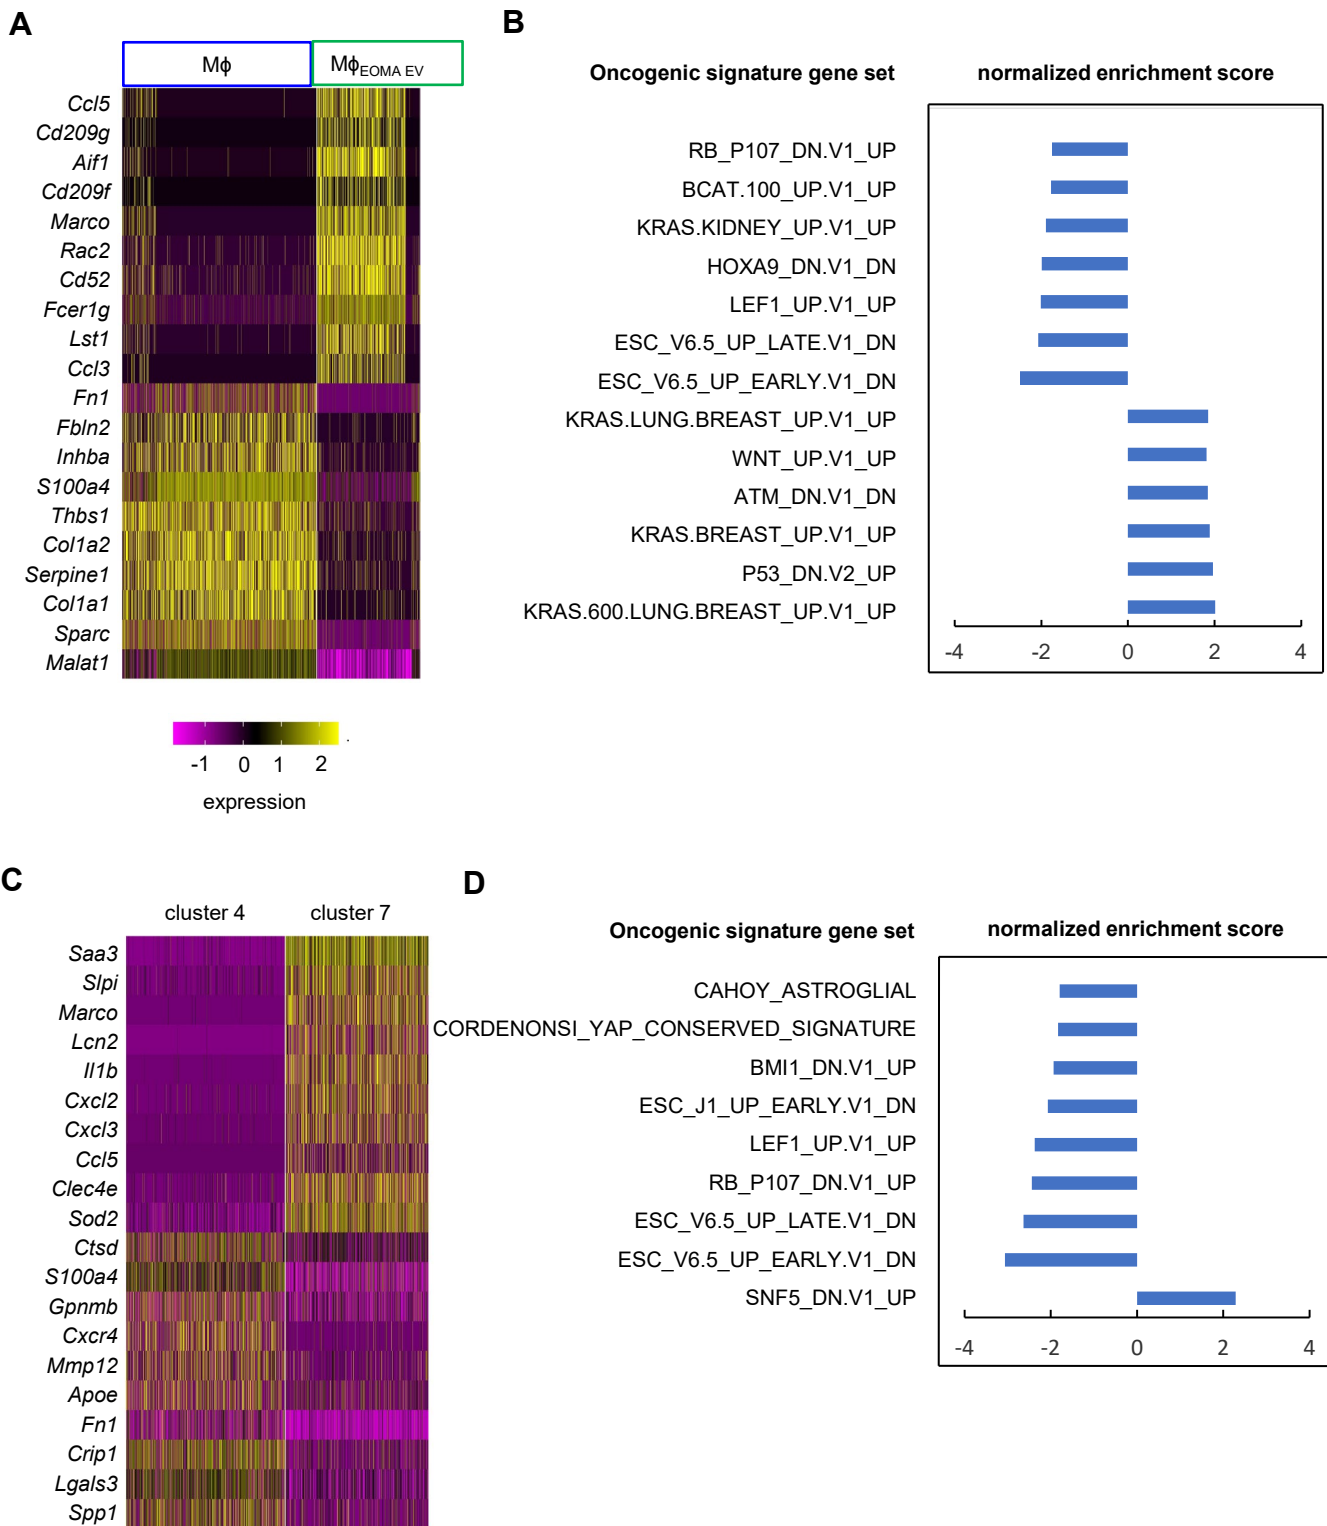

**Figure S8**

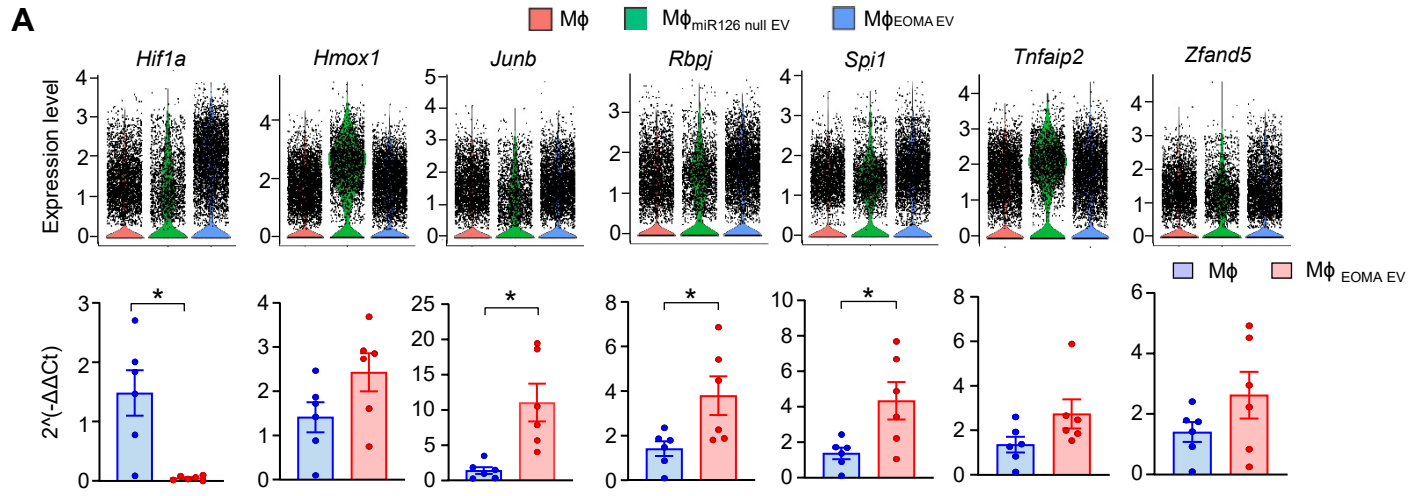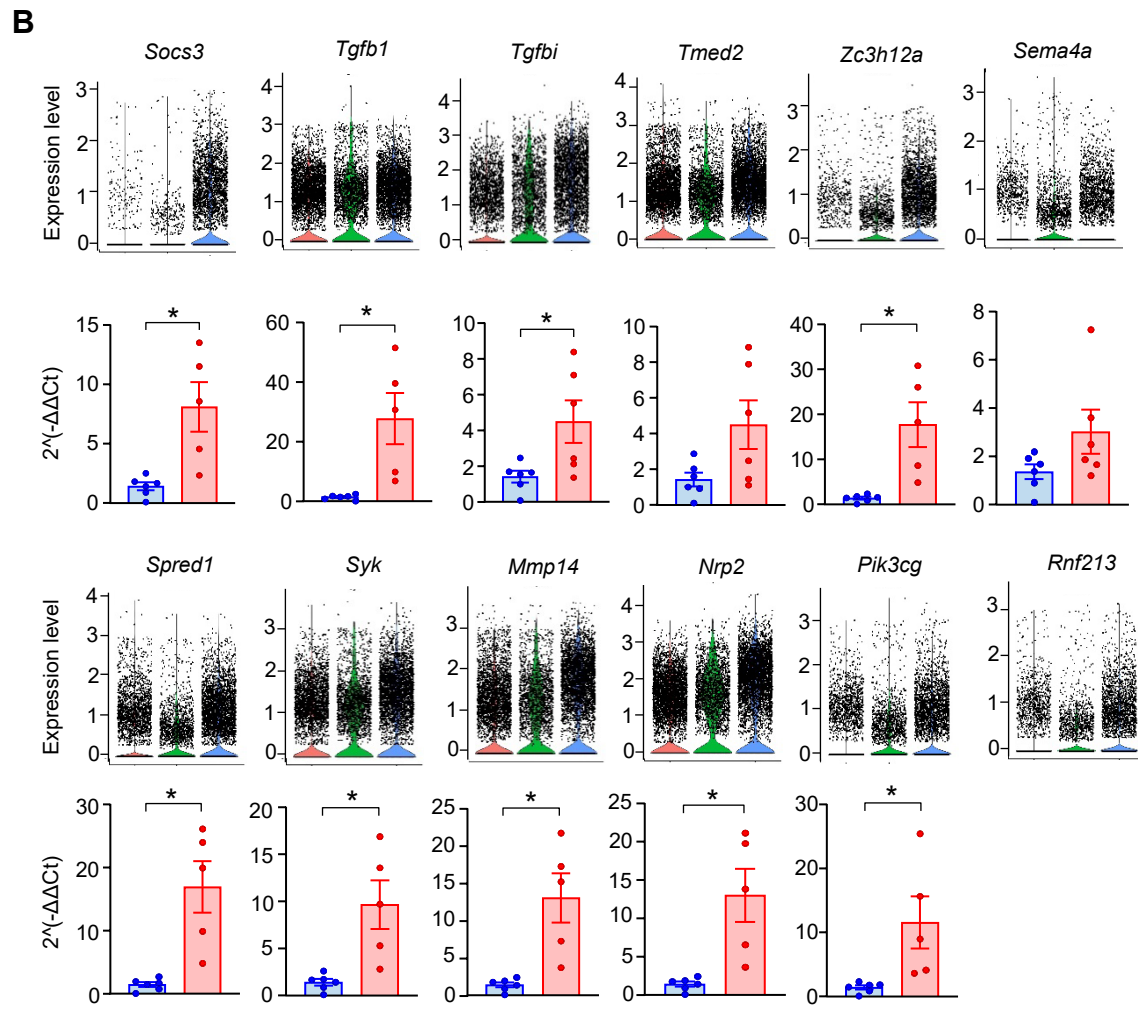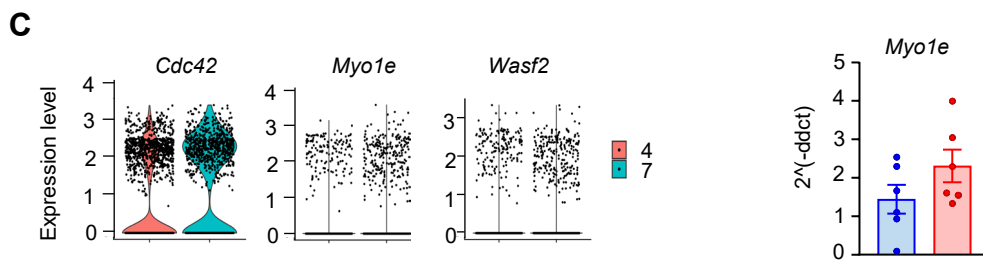

**Figure S9**

**A**

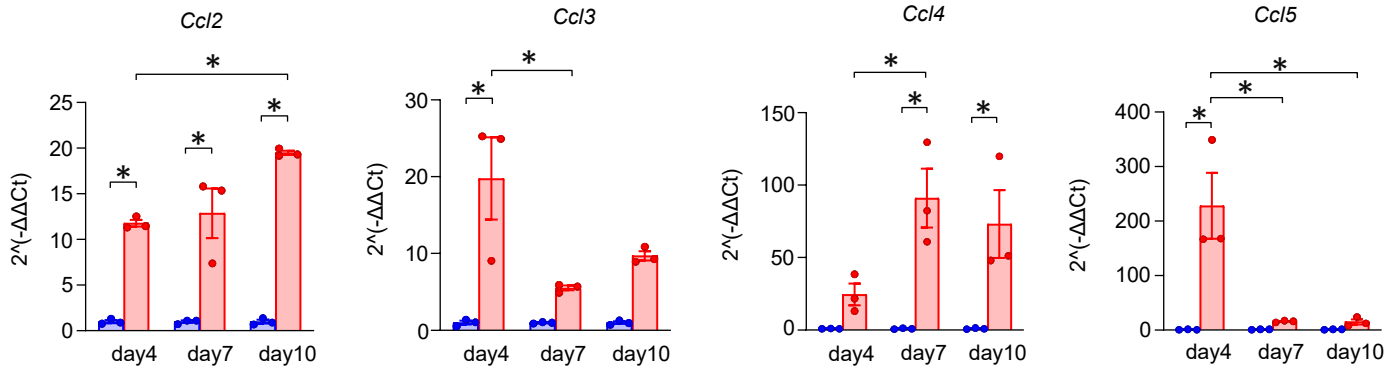

**B**

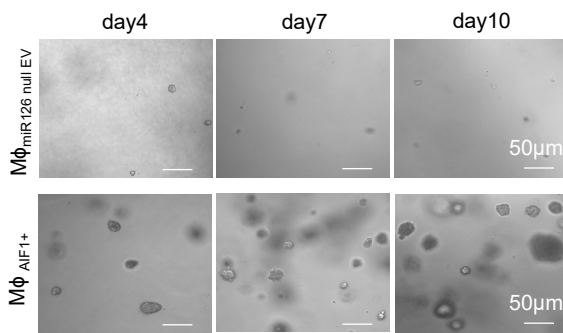

**C**

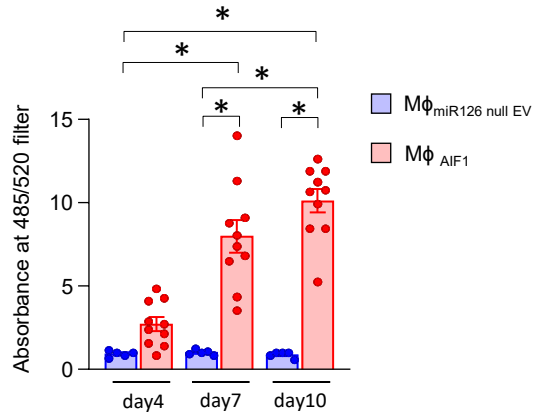

**D**

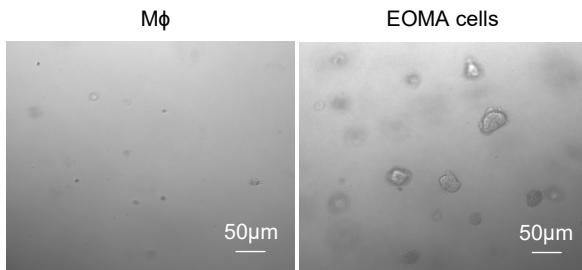

**E**

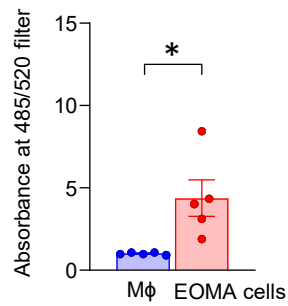



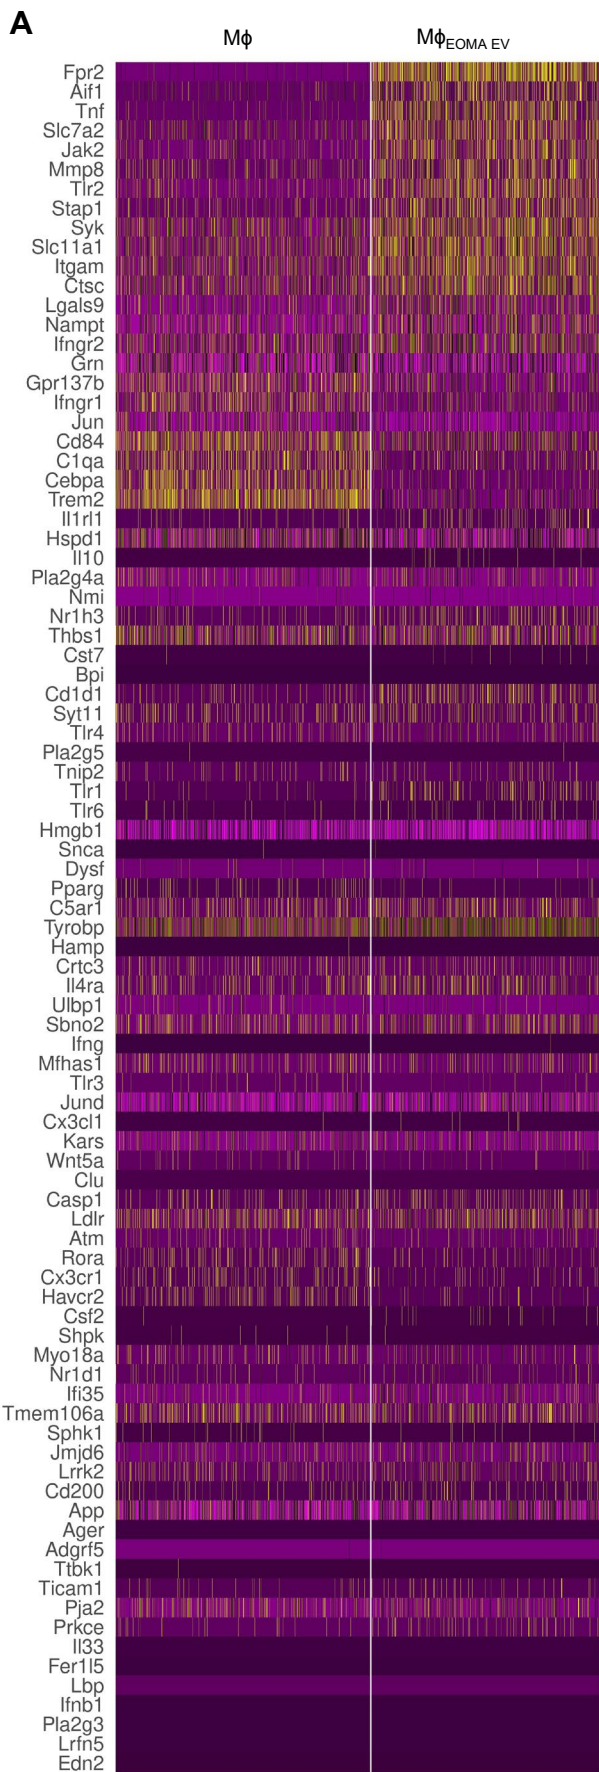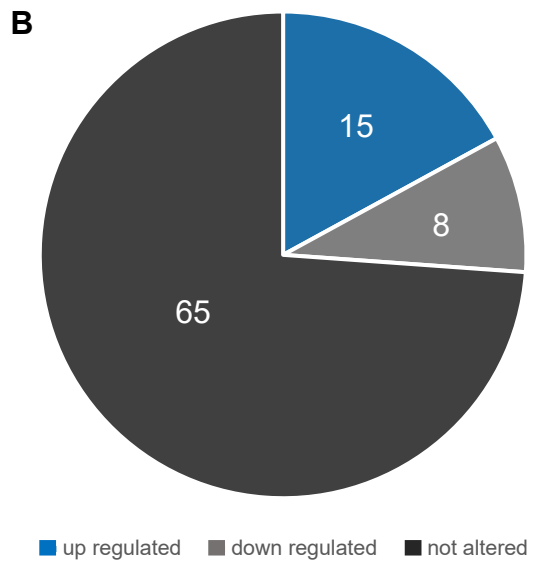

Expression

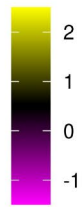

**Figure S11**

**Supplementary Tables:**

**Sup Table 1:** Number of cells in each cluster in the samples analyzed for single cell RNA sequencing

**Sup Table 2:** Top 10 markers for each cluster identified in single cell RNA seq data

**Sup Table 3:** Differentially expressed genes in M $\phi$ EOMA EV compared to M $\phi$

**Sup Table 4:** Differentially expressed genes in Cluster 7 vs Cluster 4

**Sup Table 5:** Gene Set Enrichment Analysis (GSEA) between M $\phi$  and M $\phi$ EOMA EV

**Sup Table 6:** Vascular development genes analyzed between samples
